# Supplementary material for: Extended Spectrum β-Lactamase-Producing Enterobacterales of Shrimp and Salmon Available for Purchase by Consumers in Canada—A Risk Profile Using the Codex Framework
Source: Antibiotics (Basel). 2023 Sep 6;12(9):1412. doi: 10.3390/antibiotics12091412 (PMC10525137; doi:10.3390/antibiotics12091412)
Supplement: Supplementary file 1 [file antibiotics-12-01412-s001.zip › Excel File S1.xlsx]

## Sheet: Data quality parameters
Antibiotics ESBL-Enterobacteriaceae of shrimp and salmon available for purchase by consumers in Canada - A risk profile using the Codex framework F. Carl Uhland1*, Xian-Zhi Li2, Michael R. Mulvey3, Richard Reid-Smith1, Lauren M. Sherk1, Hilary Ziraldo1, Grace Jin1, Kaitlin M. Young3, Mark Reist2, Carolee A. Carson1 1Centre for Food-borne, Environmental and Zoonotic Infectious Diseases, Public Hea…
A measurement of data quality/relevance was provided for each section of the risk profile using the criteria below. Publications are considered only once in the data qualtity evaluation of each section, even if their citation is repeated.
Score	Criterion	Definition
	Applicability to Canadian context	Applicability of the data within a Canadian context is based principally on the location of information collection. Laboratory or fundamental science based publications are also considered as applicable in the Canadian context in some circumstances. eg. Microbiological evaluation of fish, Cwikova, O., 2016; http://www.potravinarstvo.com/journal1/index.php/potravinarstvo/article/view/617 Papers ex…
3	Canada
2	USA and Mexico
1	Other geographic region/non-specific/review
0	Unknown
	Source of information
4	Active surveillance	The source of information refers to the type of study or publication. Surveillance studies pertinent to the AMR-food safety issue were considered of higher value than a peer reviewed prevalence study for example, which were in turn deemed to provide more impactful information than a review of the subject.
3	Passive surveillance
2	Peer reviewed publication/primary research, government publications
1	Reviews, textbooks
0	Non-empirical information
	Date of publication
3	≥2014	Date of data collection was used when available. Publication date was used if authors made no mention of data collection dates. Seven year intervals from 2021 were chosen as a publication scale to provide an indication of the age of the paper and applicability to the current AMR-food safety issue.
2	2007-2013
1	<2007
	Data score tallies
	Data quality finale score of publication	Sum of publication evaluation, value of 1-10
	Subsection score	Average of all publication data quality scores for the section
	Total section score	Average of all subsection data quality scores
		Higher summed scores indicated higher quality data and better applicability to the current evaluation of risk

## Sheet: Data quality evaluation
						ask
Summary of data quality and level of concern
Codex Risk Profile Element	Applicability to Canadian context	Source of Information	Date of publication or data collection		Data Quality final score	Summary comments for section/Data gaps
	Canada=3 USA and Mexico=2, Other geographic region/non-specific/review=1 Unknown=0	Active surveillance=4 Passive surveillance=3, Peer reviewed publication/primary research, government publications=2, Reviews, textbooks=1, Non-empirical information=0	≥2014=3 , 2007-2013=2, <2007=1	Date of data Collection = C Date of pulication = P	1 to 10
1. Description of the AMR food safety issue
2. Information on AMR microorganism(s) and / or determinant (s)
2.1 Characteristics of the identified foodborne microorganism(s)
2.1.1. Sources and Transmission routes
Loest 2022	3	2	3	P	8
Adelowo 2018	1	2	2	C	5
Berthe 2013	1	2	2	P	5
Martin 2019	3	2	3	C	8
Miget 2011	1	1	1	P	3
Young 2023	2	2	3	P	7
Janecko 2022	3	3	3	C	9
Sub-section score	2	2	2.42857		6.16667
2.1.2. Pathogenicity, virulence, and linkage to resistance of particular strains
Croxen 2013	3	2	3	P	8
Kaper 2004	1	2	3	P	6
Brahmi 2015	1	2	2	C	5
Brahmi 2018	1	2	2	C	5
Clermont 2013	3	2	2	P	7
Vitas 2018	1	2	3	C	6
Said 2017	1	2	3	C	6
P.Q. Le 2021	1	2	3	C	6
Maluta 2016	3	2	3	P	8
Baniga 2020	1	2	3	C	6
Roschanski 2017	1	2	3	C	6
Manges 2015	3	2	2	C	7
Sivaraman 2020	1	2	3	C	6
Ranjan 2018	3	2	3	P	8
Sub-section score	1.71429	2	2.71429		6.42857
2.1.3. Growth, survivability, and inactivation in foods (e.g., D-value, minimum pH for growth, etc.) of foodborne AMR microorganisms in the food commodity production to consumption continuum
Hansen 2008	2	2	1	C	5
Loest 2022	3	2	3	P	8
Kumar 2015	3	2	3	P	8
USFDA 2022	3	2	3	P	8
Cwikova 2016	3	2	3	P	8
Kumar 2015	3	2	3	P	8
Li and Ganzle 2016	1	1	3	P	5
Rajkowski 2012	3	2	2	P	7
Sharma 2021	2	2	3	C	7
Glover 2009	3	2	1	C	6
Okpala 2015	3	2	3	P	8
Rizo 2015	3	2	3	P	8
Schmidt and Fontana 2008	3	1	1	P	5
USFDA 2014	3	2	3	P	8
Sub-section score	2.71429	1.85714	2.5		7.07143
2.1.4. Distribution, frequency and concentrations of the AMR hazard(s) in the food chain
Alegria 2020	1	2	3	P	6
Dahms 2015	1	2	2	C	5
Singh 2017	1	2	3	C	6
Singh 2020	1	2	3	C	6
Loest 2022	3	2	3	P	8
Rhodes 1988	3	2	1	P	6
Wang and Doyle 1998	3	2	1	P	6
Hooban 2020	2	2	3	P	7
Hamza 2020	1	2	3	P	6
Shaban 2017	1	2	3	P	6
Xu 2020	1	2	3	C	6
Faridullah 2016	1	2	3	P	6
Lalitha and Surendran 2004	1	2	1	C	4
Baniga 2020	1	2	3	C	6
Hassen 2020	1	2	3	C	6
Hoa 2020	1	2	3	C	6
Moremi 2016	1	2	3	C	6
Nakayama 2017	1	2	3	P	6
Sellera 2018	1	2	3	C	6
Zarfel 2017	1	2	3	C	6
Zhou 2018	1	2	3	C	6
Sivaraman 2021	1	2	3	C	6
Abd-El-Aziz 2016	1	2	3	C	6
Dewanti-Hariyadi 2005	1	2	1	C	4
Keeratipibul 2009	1	2	1	C	4
Tate 2022	2	3	3	C	8
Bakr 2011	1	2	2	C	5
Kumar 2009	1	2	1	C	4
Hatha 1997	1	2	1	C	4
Tamber 2021	3	2	3	C	8
Young 2023	2	2	3	P	7
P.Q. Le 2021	1	2	3	P	6
Sharma 2021	2	2	3	C	7
Janecko 2022	3	3	3	C	9
Sub-section score	1.41176	2.05882	2.52941		6
2.2. Characteristics of the resistance expressed by the AMR microorganism(s) and/or determinant
2.2.1. Resistance mechanisms and location of AMR determinants
Bradford 2001	1	1	1	P	3
Baniga 2020	1	2	3	C	6
Gawish 2021	1	2	3	C	6
X.Liu 2017	1	2	3	C	6
Roschanski 2017	1	2	3	C	6
Castanheira 2021	1	1	3	P	5
Li 2007	1	1	2	P	4
Brahmi 2015	1	2	2	C	5
Brahmi 2018	1	2	2	C	5
Cerdeira 2020	1	2	3	C	6
Hoa 2020	1	2	3	C	6
P.Q. Le 2021	1	2	3	C	6
M.Liu 2013	1	2	2	C	5
Mani 2018	1	2	3	C	6
Meng 2017
Nadimpalli, Maya 2019	1	2	3	C	6
Nadimpalli 2019	1	2	3	C	6
D. P.Nguyen 2016	1	2	3	C	6
Said 2017	1	2	3	C	6
Sapugahawatte 2020	1	2	3	C	6
Silva 2019	1	2	3	C	6
Singh 2020	1	2	3	C	6
Sousa 2011	1	2	2	C	5
Thongkao 2020	1	2	3	C	6
Moremi 2016	1	2	3	C	6
Vu 2018	1	2	3	C	6
Sub-section score	1	1.88	2.72		5.6
2.2.2. Cross-resistance and/or co-resistance to other antimicrobial agents
Bradford 2001	1	1	1	P	3
Livermore 2008	1	1	2	P	4
P.Q. Le 2021	1	2	3	C	6
X.Liu 2017	1	2	3	C	6
Naik 2018	1	2	3	C	6
Sivaraman 2020	1	2	3	C	6
Stange 2019	1	2	3	C	6
Vu 2018	1	2	3	C	6
Said 2017	1	2	3	C	6
Hoa 2020	1	2	3	C	6
M.Liu 2013	1	2	2	C	5
Sousa 2011	1	2	2	C	5
Cabello 2013	1	1	2	P	4
Heuer 2009	1	1	2	P	4
Gibson 2020	1	2	3	C	6
X.Liu 2018	1	1	3	P	5
Nakayama 2017	1	2	3	P	6
Yang 2018	1	1	3	P	5
Baniga 2020	1	2	3	C	6
Dang 2011	1	2	2	C	5
Franz 2015	1	2	2	C	5
Hamza 2020	1	2	3	P	6
Sellera 2018	1	2	3	C	6
Xu 2020	1	2	3	C	6
Sub-section score	1	1.75	2.625		5.375
2.2.3. Transferability of resistance determinants between microorganisms
Bradford 2001	1	1	1	P	3
Partridge 2018	1	1	3	P	5
Cabello 2013	1	1	2	P	4
M.Liu 2013	1	2	2	C	5
Said 2017	1	2	3	C	6
Watts 2017	1	1	3	P	5
Xu 2020	1	2	3	C	6
Carratolli 2009	1	1	2	P	4
Mani 2018	1	2	3	C	6
Gawish 2021	1	2	3	C	6
Naik 2018	1	2	3	C	6
Sub-section score	1	1.54545	2.54545		5.09091
Total section score					5.9618	This section details information concerning the microorganisms, AMR and/or determinants comprised within the food safety issue examined in this risk profile. The data quality score was 6.0. Most publications consulted were recent and peer reviewed, and some pure science research subjects were considered applicable to the Canadian context (ex. molecular studies). However, the majority of the manus…
3. Information on the antimicrobial agent to which resistance is expressed
3.1. Class of the antimicrobial agent
3.2. Non-human uses of the antimicrobial agent(s)
Chuah 2016	1	1	3	P	5
Higuera-Llantén 2018	1	2	3	P	6
Holmstrom 2003	1	2	1	C	4
Manage 2018	1	1	3	P	5
Miranda 2018	1	1	3	P	5
Pham 2015	1	2	2	C	5
Morrison 2013	3	2	2	C	7
Rico 2013	1	2	2	C	5
WOAH 2018	3	2	2	P	7
Phu 2016	1	2	2	C	5
Song 2016	1	2	3	C	6
Young 2023	2	2	3	P	7
Fisheries and Oceans 2020	3	3	3	C	9
Health Canada 2022	3	3	3	P	9
Health Canada 2010	3	2	2	P	7
Sub-section score	1.73333	1.93333	2.46667		6.13333
3.3. Human uses of the antimicrobial agent(s)
3.3.1. Spectrum of activity and indications for treatment
Reference to Carson 2019
Sub-section score
3.3.2. Importance of the antimicrobial agents including consideration of critically important antimicrobial lists
Reference to Carson 2019
Sub-section score
3.3.3. Distribution, cost and availability
Carson 2019	3	2	3	P	8
Government of Alberta 2020	3	2	3	P	8
Government of British Columbia 2020	3	2	3	P	8
Government of Ontario 2021	3	2	3	P	8
Government of Saskatchewan 2020	3	2	3	P	8
Sub-section score	3	2	3		8
3.3.4. Availability of alternative antimicrobial agents
CDC 2019	2	2	3	P	7
Tamma 2020	3	2	3	P	8
Son 2018	3	2	3	P	8
Rupp 2003	1	1	3	P	5
Russo 2021	3	2	3	P	8
Zhanel 2021	3	2	3	C	8
Sub-section score	3	2	3		7.33333
3.3.5. Trends in the use of antimicrobial agents(s) in humans
PHAC 2020a	3	3	3	C	9
PHAC 2018	3	3	3	C	9
PHAC 2020b	3	3	3	C	9
Carson 2019	3	2	3	P	8
Rudnick 2020	3	3	3	C	9
Liang 2022	3	2	3	C	8
Rudnick 2023	3	3	3	C	9
Sub-section score	3	2.71429	3		8.71429
Total section score					7.54524	The data quality score for this section is 8. There is excellent and recent information regarding AMU in the Canadian aquaculture industry. However, there is a lack of information concerning AMU practices for imported seafood products, which leads to uncertainty concerning risk associated with AMU and AMR development. Canadian information regarding distribution, costs, availability and AMU trends…
4. Information on food commodity(ies)
4.1. Sources (domestic and imported), production volume, distribution and per capita consumption of foods or raw material identified with the AMR hazard(s) of concern
Fisheries and Oceans Canada 2021b	3	2	3	C	8
Fisheries and Oceans Canada 2021c	3	2	3	C	8
Fisheries and Oceans Canada 2021a	3	2	3	C	8
Loest 2022	3	2	3	P	8
Cai 2019	2	2	3	P	7
Fisheries and Oceans Canada 2022	3	2	3	P	8
Fisheries and Oceans Canada 2020	3	2	3	C	8
Agriculture and Agrifood Canada 2023	3	2	3	P	8
Hu 2021	3	2	3	C	8
Sub-section score	2.88889	2	3		7.875
4.1.1. Characteristics of the food product(s) that may impact risk management (e.g. further processed, consumed cooked, pH, water activity, etc.)
Huss 2000	1	1	1	P	3
Agriculture and Agrifood Canada 2011	3	2	2	P	7
CDC 2019	2	2	3	C	7
CDC 2021	2	2	3	C	7
Bandekar 2004	1	2	1	C	4
Moretro 2016	1	2	2	C	5
CFIA 2019	3	2	3	P	8
Sub-section score	1.85714	1.85714	2.14286		5.85714
4.1.2. Description of the food production to consumption continuum (e.g. primary production, processing, storage, handling, distribution and consumption) and the risk factors that affect the microbiological safety of the food product of concern
Reference to Loest 2022
Total section score					6.86607	The quality score for this section is 6.9. This reflects the information available for seafood production and sources, as well as characteristics of the food products which may impact risk management. The description of the food production continuum was not included in this evaluation, and the reader is referred to a previous risk profile (Loest 2022) which details this section. The data availabl…
5. Information on adverse public health effects
5.1. Characteristics of the disease caused by the identified foodborne AMR microorganisms or by pathogens that have acquired resistance determinants via food
5.1.1. Trends, prevalence, and nature of AMR foodborne disease in people
Finlay 2019	3	2	3	P	8
Livermore 2006	1	2	1	P	4
CDC 2019	2	3	3	C	8
Mineau 2018	3	2	3	C	8
Chong 2011	1	1	2	P	4
Pitout 2005	1	1	1	P	3
Lagacé-Wiens 2019	3	3	3	C	9
Karlowsky 2021	3	3	3	C	9
Chong 2018	1	1	3	P	5
Peirano 2019	1	1	3	P	5
BC CDC 2015	3	3	3	C	9
Public Health Ontario 2020	3	3	3	C	9
Mitchell 2019	3	2	3	P	8
Martin 2019	3	3	3	C	9
Garner 2015	3	2	3	P	8
Sub-section score	2.26667	2.13333	2.66667		7.06667
5.1.2. Epidemiological pattern (outbreak, sporadic), regional, seasonal or ethnic differences in the incidence
Bush 2008	3	2	1	P	6
Castenheira 2021	1	2	3	P	6
Bevan 2017	1	2	3	P	6
Valentin 2014	1	2	3	P	6
Karlowsky 2021	3	3	3	C	9
Patrick 2014	3	2	3	P	8
Wielders 2020	1	2	3	C	6
Martinez 2020	1	2	3	C	6
Sun 2012	2	2	2	C	6
Schmiege 2021	1	2	3	C	6
Caucci 2016	1	2	2	C	5
Rao 2015	1	2	2	C	5
Lubbert 2015	1	2	2	C	5
van den Bunt 2019	1	2	3	C	6
Huss 2000	1	1	1	P	3
Iwamato 2010	2	1	2	P	5
Todd 1997	3	2	1	P	6
Mascarenhas 2019	3	1	3	P	7
CDC 2015	2	2	3	P	7
CDC 2021	2	2	3	P	7
Sub-section score	1.7	1.9	2.45		6.05
5.1.3. Susceptible populations and risk factors
Cardwell 2016	2	2	2	C	6
Finlay 2019	3	2	3	P	8
Flokas 2017	1	2	3	P	6
Laupland 2008	3	2	1	C	6
Lautenbach 2001	2	2	1	C	5
Ofner-Agostini 2009	3	2	1	C	6
Sub-section score	2.33333	2	1.83333		6.16667
5.1.4. Burden of illness: Impact on outcomes
MacKinnon 2020	3	2	3	P	8
Naylor 2018	1	2	3	P	6
Sakellariou 2016	1	2	2	C	5
Denkel 2020	1	2	3	C	6
Chaulk 2014	3	2	2	C	7
Gudiol 2010	1	2	1	C	4
Lautenbach 2001	2	1	1	C	4
Maslikowska 2016	3	2	2	C	7
Melzer 2007	1	2	1	C	4
Peralta 2007	1	2	1	C	4
Rottier 2012	1	2	2	P	5
Schwaber 2007	1	2	2	P	5
Trecarichi 2009	1	2	2	C	5
Tumbarello 2010	1	2	1	C	4
Barnett 2011	1	2	2	C	5
Leistner 2014	1	2	2	C	5
Stewart 2021	1	2	3	C	6
Lee 2006	2	2	1	C	5
MacVane 2014	2	2	2	C	6
Kola 2007	1	2	1	C	4
McDonald 2021	1	2	3	P	6
Esteve-Palau 2015	1	2	2	C	5
Park 2015	1	2	2	C	5
Finlay 2019	3	2	3	C	8
Sub-section score
Total section score	1.45833	1.95833	1.95833		5.375
					6.16458	The overall average data quality for this section is 6.2. The lack of Canadian BOI data concerning ESBL-EB is a major gap. Given the available information, it is reasonable to expect increases in mortality and hospital costs, encompassing increased LOS and treatment failures, from ESBL-EB, compared to infections caused by susceptible bacteria. The level of concern is estimated at 3, based on thes…
6. Risk Management Information
6.1. Identification of risk management options to control the AMR hazard along the production to consumption continuum, both in the pre-harvest and post-harvest stage
6.1.1. Measures to reduce the risk related to the selection and dissemination of foodborne AMR microorganisms
6.1.2. Measures to minimize the contamination and cross-contamination of food by AMR microorganisms
6.1.3 Utilisation of Whole Genome Sequencing as a surveillance-based risk management tool to control AMR hazard along the sea-food to fork continuum
Amarasiri 2020	1	2	3	P	6
Zhang 2009	1	2	2	P	5
Lekunberri 2018	1	2	3	P	6
PHAC 2022	3	3	3	C	9
Ekwanzala 2020	1	2	3	C	6
Lee 2020	1	2	3	C	6
Runcharoen 2017	1	2	3	C	6
Nadimpalli, Maya 2019	1	2	3	C	6
Waddington 2022	1	2	3	P	6
WHO 2020	1	2	3	P	6
Canton 2012	1	2	2	P	5
Cabello 2013	1	1	2	P	4
Rico 2013	1	2	2	C	5
Government of Canada 2009	3	2	2	P	7
Orlek 2017	1	2	3	P	6
Coque 2008	3	2	1	C	6
NIHR Global Health Research Unit on Genomic Surveillance of AMR 2020	1	2	3	P	6
Quince 2017	1	2	3	P	6
Amann 1995	1	2	1	P	4
Bloomfield 1998	1	1	1	P	3
Ebmeyer 2019	3	2	3	P	8
Rossolini 2008	1	2	2	P	5
Takasu 2011	1	2	2	C	5
van der Werf 2019	1	2	3	P	6
Total section score	1.33333	1.95833	2.45833		5.75	The evaluation of risk management actions in the Canadian context are difficult at present, as a good proportion of the seafood production chain is located in exporting countries. Regulatory and enforcement differences between Canada and seafood exporters concerning AMU can have an important impact on AMR in the final product. Auditing and approving production and processing practices of exportin…
7. Evaluation of available information and major knowledge gaps
